# Supplementary material for: Evolutionary stasis of a heritable morphological trait in a wild fish population despite apparent directional selection
Source: PubMed Central journal article supplement (PMC6617767; doi:10.1002/ece3.5274), 2019-06-11
Supplement: ECE3-9-7096-s001.pdf [file ECE3-9-7096-s001.pdf]

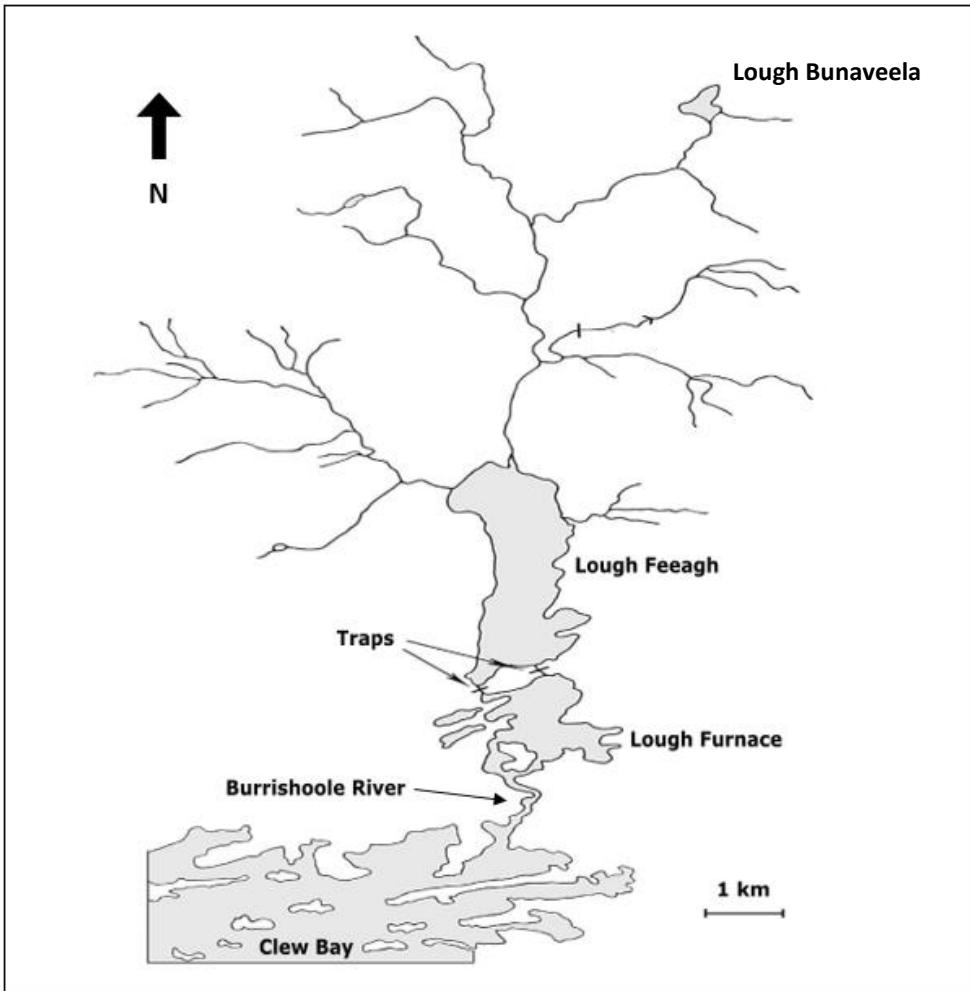

Figure S1: Map of the Burrishoole catchment, County Mayo, Ireland. Adapted from McGinnity et al., 2003.
