# Supplementary material for: Evolutionary stasis of a heritable morphological trait in a wild fish population despite apparent directional selection
Source: PubMed Central journal article supplement (PMC6617767; doi:10.1002/ece3.5274), 2019-06-11
Supplement: ECE3-9-7096-s004.pdf [file ECE3-9-7096-s004.pdf]

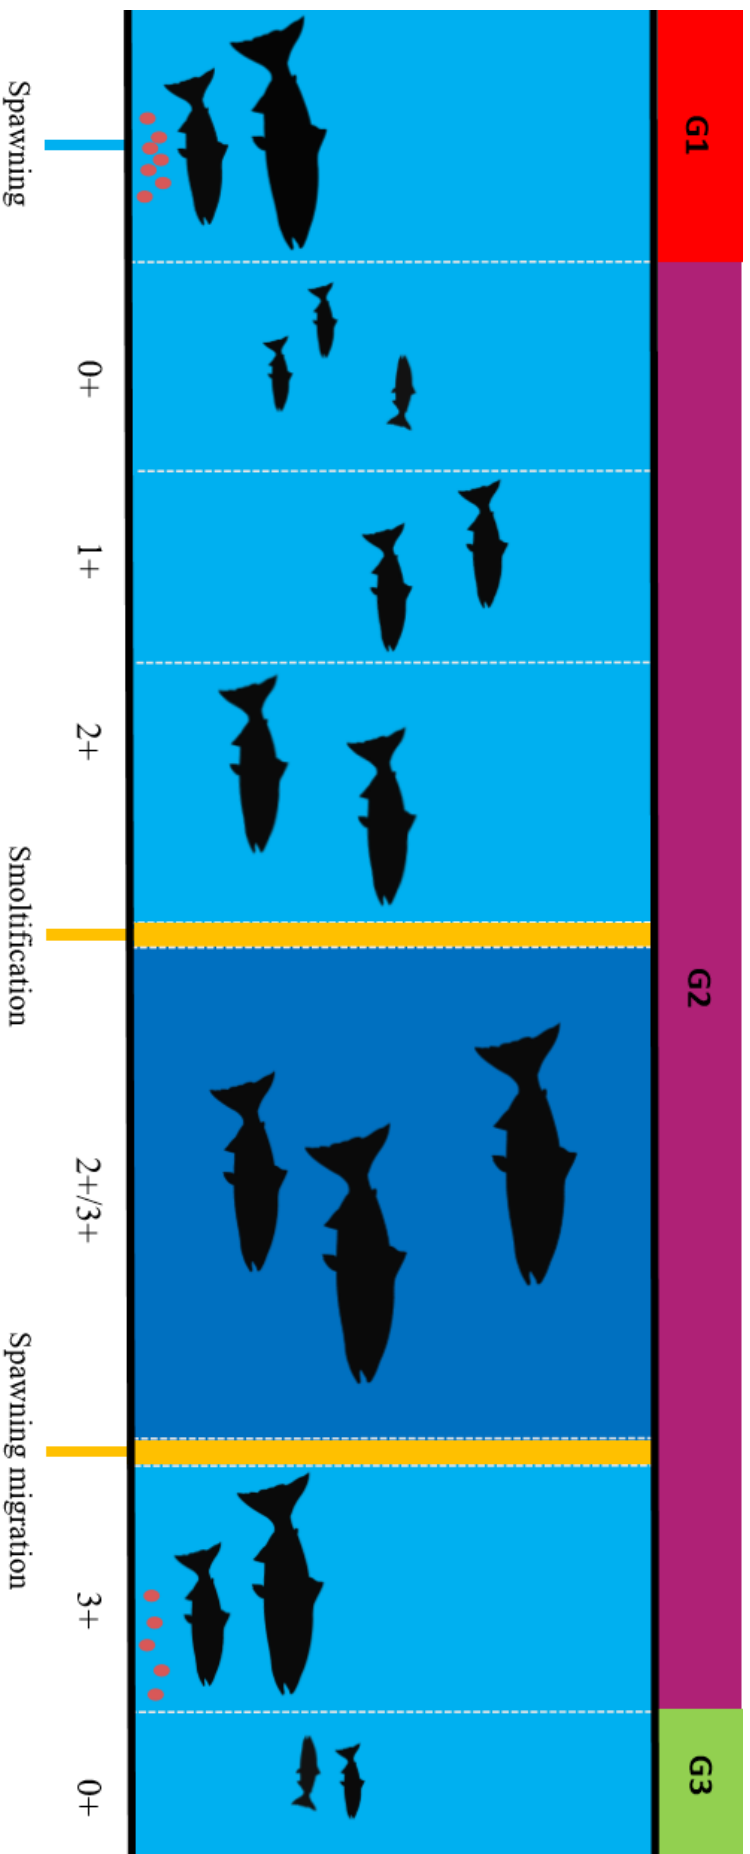

Figure S4: Stylized four-year lifecycle of Burritshoole Atlantic salmon. Adult fish spawn in freshwater, G1. G1's offspring, G2, typically spend 3 years in freshwater (0+, 1+, 2+) before leaving the river (smoltification) during their third year of life, and undergoing an oceanic feeding stage (2+/3+). G2 typically return to freshwater to spawn during their fourth year of life (3+), giving rise to the next generation, G3.
